# Supplementary material for: Recombinant Analogs of Sea Anemone Kunitz-Type Peptides Influence P2X7 Receptor Activity in Neuro-2a Cells
Source: Mar Drugs. 2023 Mar 20;21(3):192. doi: 10.3390/md21030192 (PMC10053369; doi:10.3390/md21030192)
Supplement: Supplementary file 1 [file marinedrugs-21-00192-s001.zip › marinedrugs-2299532-supplementary.pdf]

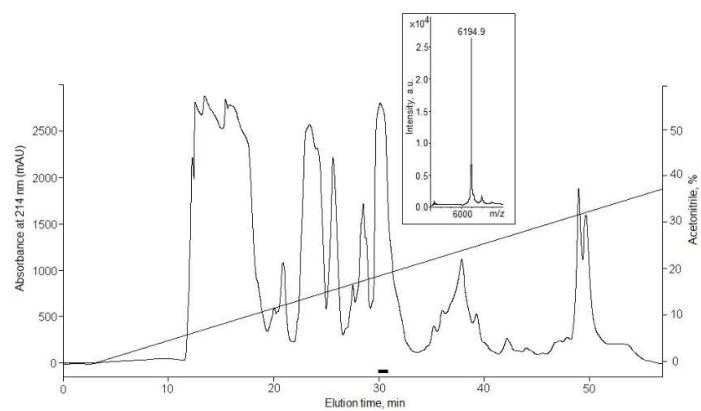

(a)

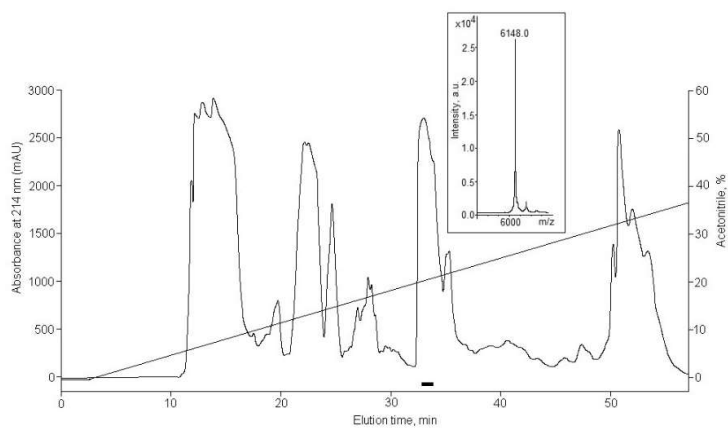

(b)

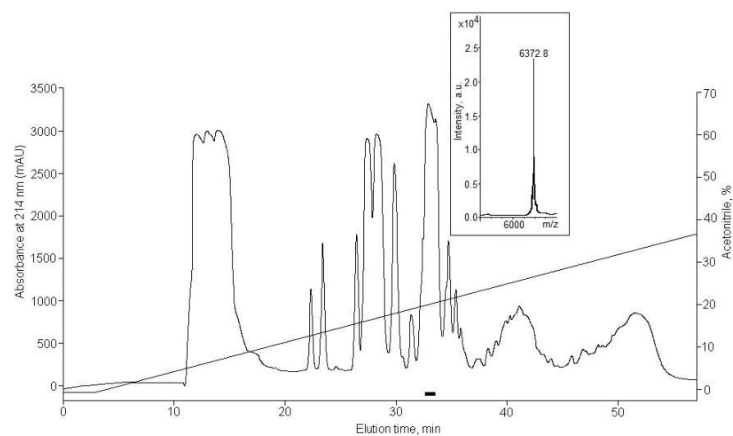

(c)

**Figure S1.** The RP-HPLC elution profiles of Kunitz peptides: HCRG1 (a), HCRG2 (b), and HCRG7 (c), on a Jupiter C4 column (Phenomenex, USA), equilibrated by 0.1% TFA, pH 2.2, in a gradient of acetonitrile concentration (0–70%) for 70 min at 1.5 mL/min. MALDI mass spectra of average molecular weight of peptides are shown in insert. Black solid lines accentuate fractions from which the peptide was isolated.

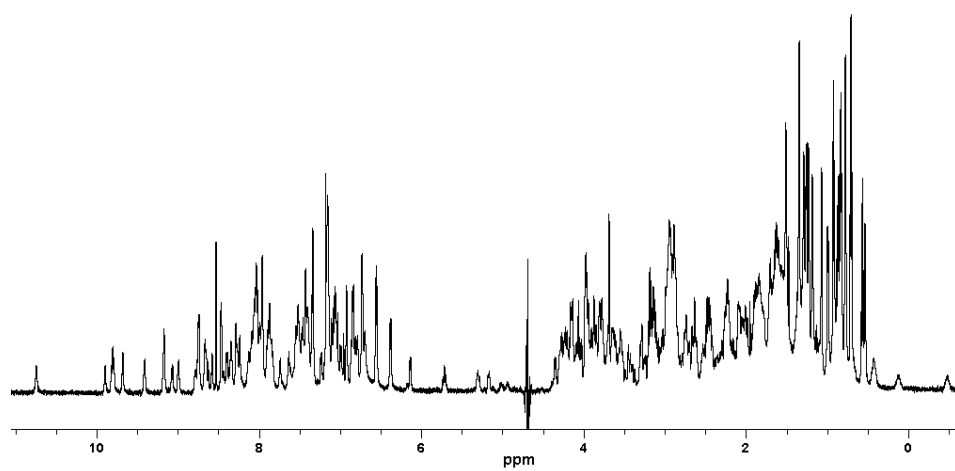

(a)

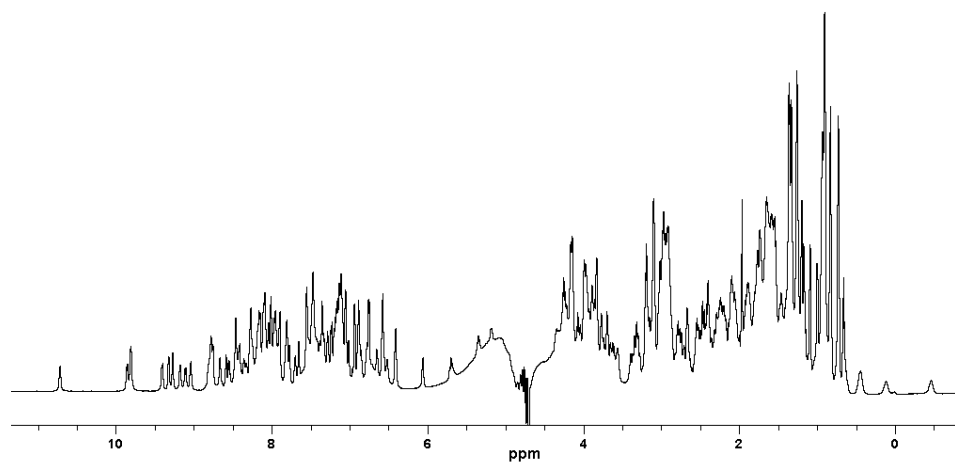

(b)

**Figure S2.** <sup>1</sup>H NMR spectra of HCRG1 (a) and HCRG7 (b).

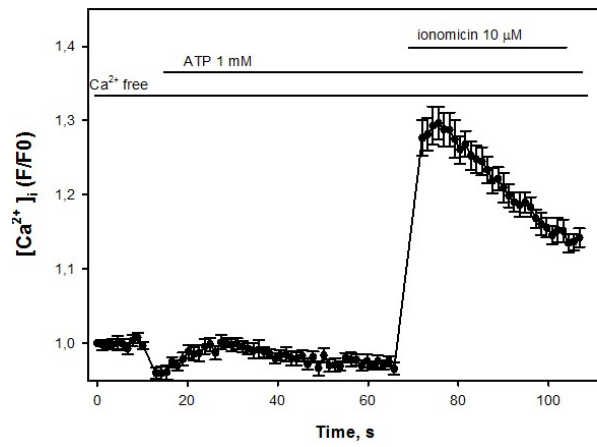

(a)

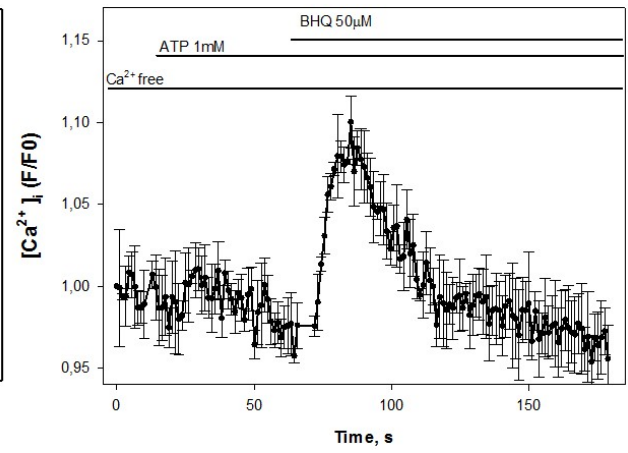

(b)

**Figure S3.** Representative traces of  $[Ca^{2+}]_i$  increase induced by ionomycin ( $10 \mu M$ ) in the presence of ATP  $1 \text{ mM}$  in  $Ca$ -free medium in Neuro-2a cells (a). Influence of SERCA blocker BHQ ( $50 \mu M$ ) in  $Ca$ -free medium on  $Ca^{2+}$  influx caused by ATP ( $1 \text{ mM}$ ) in Neuro-2a cells (b). The data are presented as the  $m \pm SE$  values ( $n = 6$ ).
